# Supplementary material for: “The phone number tells us good things we didn’t know before.” Use of interactive voice response calling for improving knowledge and uptake of family planning methods among Maasai in Tanzania
Source: PubMed Central journal article supplement (PMC10198512; doi:10.1371/journal.pdig.0000254), 2023-05-19
Supplement: pdig.0000254.s001.pdf [file pdig.0000254.s001.pdf]

# Survey

Study ID \_\_\_\_\_

Husband ID \_\_\_\_\_

---

---

## Screening

Initials \_\_\_\_\_  
(3 digits)Screening date \_\_\_\_\_  
(dd/mm/yy)Sex  
 Male  
 FemaleInclusion criteria  
 Husband or wife of Maasai couple  
 Age between 12-65 for men/12-50 for women  
 Willing to receive/user IVRC  
 Able to understand and willing to sign the, informed consent document  
 In possession of a mobile phone or willing to use a provided mobile phone  
 Living in Esilalei  
(Check if yes)EXclusion criteria  
 Women of non-childbearing age  
 Women who have had a tubal ligation procedure  
 Women who are known to be infertile  
(check if no)

---

---

## Demographics

DEM1. Sex  
 Female  
 Male

DEM2. How old are you? (include approximation) \_\_\_\_\_

DEM2. If she knows date of birth \_\_\_\_\_  
(dd/mm/yy)DEM2. How old are you? How old on the last birthday  
how old she was \_\_\_\_\_  
(yrs)

DEM2. How old are you? Time event(season) \_\_\_\_\_

DEM3. Where do you live? Region \_\_\_\_\_

DEM3. Where do you live? District \_\_\_\_\_

DEM3. Where do you live? Ward \_\_\_\_\_

DEM4. Place of birth? Region \_\_\_\_\_

DEM4. Place of birth? District \_\_\_\_\_

DEM4. Place of birth? Ward \_\_\_\_\_

DEM5. What language do you speak most often at home?

- Swahili  
 Maa  
 English  
 Other

DEM5. What language do you speak most often at home?  
Other specify

\_\_\_\_\_ (specify if other checked)

DEM6. What is your religion?

- Christian  
 Muslim  
 No religion  
 Other religion

DEM6. What is your Christian? Other Christian  
religion specify

\_\_\_\_\_

DEM6. What is your religion? Other religion specify

\_\_\_\_\_

DEM7. What is the highest level of school that you  
completed?

- No formal education  
 Standard 1  
 Standard 2  
 Standard 3  
 Standard 4  
 Standard 5  
 Standard 6  
 Standard 7  
 Secondary education (specify level attained)  
 Higher education (specify field)  
 (Secondary education specify level below, higher  
education specify field below )

DEM7. What is the highest level of school that you  
completed? Secondary education , specify level  
attained

\_\_\_\_\_

DEM7. What is the highest level of school that you  
completed? Higher education specify field

\_\_\_\_\_

DEM8. Can you read and count in swahili?(literary  
rate)

- No  
 Yes

---



---

## Socio-Economic Status

SES1. Does the house where you live have  
electricity/sola power?

- No  
 Yes

SES2. Does the house where you live have piped water  
inside/rain catchment/water filters

- No  
 Yes

SES3. Do you own a cell phone and its working?

- No  
 Yes

SES4. Are you currently working in any sector where  
you receive a regular monthly salary?

- No  
 Yes  
 (if no (skin to SES 6))

SES5. If employed: what type of work do you do?

\_\_\_\_\_ (skip to SES7)

SES6. If not employed: If you are not formally employed, what do you do to earn an income?

- No income earning activities  
 Horticulture  
 Pastoralist  
 Petty trader  
 other, specify

If pastoralist: number of cattle's

- 25-50  
 50-75  
 75-100  
 100-125  
 125-150  
 >150

SES6. If not employed: If you are not formally employed, what do you do to earn an income? Other specify

\_\_\_\_\_

SES7: If any work: How much money do you earn per month from these activities?(on average)

\_\_\_\_\_ (Tsh.)

SES8. Do you have an account in a bank or other financial institution that you yourself use?

- No  
 Yes

SES9. Do you use your mobile phone for any financial transactions?

- No  
 Yes

SES10. Have you ever used the internet?

- No  
 Yes  
 (No, skip to SES13)

SES11. In the last 12 months, have you used the internet?

- No  
 Yes

SES12. During the last one month, how often did you use the internet?

- Not at all  
 Almost every day  
 At least once a week  
 Less than once a week

SES13. Are you covered by any health insurance?

- No  
 Yes  
 (No, skip to PAR1)

SES14. What type of health insurance are you covered by?

- CHBi  
 NHIF  
 Other, specify

SES14. What type of health insurance are you covered by? Other specify

\_\_\_\_\_

## Maternity

MAR1. Have you ever had children?

- No  
 Yes  
 (No, skip to KCM1)

MAR2. Do you have any children that are now living with you?

- No  
 Yes

MAR3. Do you have any children that are alive but do not live with you?

- No  
 Yes

MAR4. Have you ever had children who were born alive but later died?

- No  
 Yes

MAR5. Did all the children have the same biological father?

- No  
 Yes

MAR6. How old were you when your first child was born?

\_\_\_\_\_  
 (2 digits)

MAR7. How old is your youngest child?

\_\_\_\_\_  
 (2 digits)

MAR8. Have you ever had a pregnancy that miscarried, was aborted, or ended in stillbirth?

- No  
 Yes

MAR9. When did your last menstrual period start; if remember date

\_\_\_\_\_  
 (dd/mm/yy)

MAR9. When did your last menstrual period start;.... Days ago

\_\_\_\_\_

MAR9. When did your last menstrual period start; ....Weeks ago

\_\_\_\_\_

MAR9. When did your last menstrual period start; Description of the moon

\_\_\_\_\_

MAR9: No date of last menstrual period

- Unknown  
 Don't remember

MAR10. Now I would like to ask you about a woman's risk of pregnancy. From one menstrual period to next, are there certain days when a woman is more likely to become pregnant when she has sexual relations?

- No  
 Yes  
 (No, skip to MAR12)

MAR11. If YES: What description best this time?

- Just before her period begins  
 During her period  
 Right after her period has ended  
 Halfway between two periods  
 Other, specify

MAR11. If YES: What description best this time? Other specify

\_\_\_\_\_

MAR12. After the birth of child, can a woman become pregnant before her menstrual period has returned?

- No  
 Yes

## Knowledge on Contraceptive Methods

KCM1. Women can have an operation to avoid having any more children?

- No  
 Yes

KCM2. Men can have an operation to avoid having any more children?

- No  
 Yes

KCM3. Women can have a loop or coil placed inside them by a doctor or a nurse which can prevent pregnancy

- No  
 Yes

- KCM4. Women can have an injection by a health provider that stops them from becoming pregnant for one or more months  No  
 Yes
- KCM5. Women can have one or more small rods placed in their upper arm by a doctor or nurse which can prevent pregnancy for one or more years  No  
 Yes
- KCM6. Women can take a pill every day to avoid becoming pregnant  No  
 Yes
- KCM7. Men can put a rubber sheath on their penis before sexual intercourse  No  
 Yes
- KCM8. As an emergency measure, within three days after they have unprotected sexual intercourse, women can take special pills to prevent pregnancy  No  
 Yes
- KCM9. A woman uses a string of colored beads to know the days she can get pregnant. On the days she can get pregnant, partner will use condom or does not have sexual intercourse  No  
 Yes
- KCM10. Up to six months after childbirth, before, the menstrual period has returned, women can use a method to prevent pregnancy which requiring frequent breastfeeding day and night  No  
 Yes
- KCM11. To avoid pregnancy, women do not have sexual intercourse on days of the month they think they can get pregnant  No  
 Yes
- KCM12. Men can be careful and pull out before climax  No  
 Yes
- KCM13. Have you heard of any other ways or methods that women or men can use to avoid pregnancy  Yes  
 No
- If yes, mention \_\_\_\_\_
- KCM14. In the last months have you heard about family on the radio?  No  
 Yes
- KCM15. Seen anything on the television about family planning?  No  
 Yes
- KCM16. Read about family planning in a newspaper or magazine?  No  
 Yes
- KCM17. Received a voice or text message about family planning on mobile phone  No  
 Yes
- KCM18. Been in a seminar about family planning?  No  
 Yes
- KCM19. In the last few months, have you discussed family planning with a health professional?  No  
 Yes
- KCM20. Contraception is a woman's concern and a man should not have to worry about it?  Yes  
 No

KCM21: If yes, how is it?

- Before her day have started  
 During her days  
 After finishing her days  
 In between her days  
 Different

KCM22. After having a child, a woman can get pregnant before her days are coming back?

- Yes  
 No

KCM23. Contraception is a woman's concern and a man should not have to worry about it?

- Disagree a lot  
 Disagree a little  
 Agree a little  
 Agree a lot

KCM24. Women who use contraception may become promiscuous?

- Disagree a lot  
 Disagree a little  
 Agree a little  
 Agree a lot

### Relationship Status and History

RSH1. What best describes your current relationship status?

- Married  
 Single, not in a relationship(skip to RSH7)  
 In relationship, but not married  
 Separated from spouse/divorced(skip to RSH8)  
 Widow (skip to (RSH8)

RSH2. Do you currently live with your partner/husband?

- Yes, all the time  
 Yes, sometimes  
 No

RSH3. Does your husband has more than one wife?

- No  
 Yes  
 (No, skip to RSH8)

RSH4. Including yourself, in total, how many wives or live in partners does he have?

\_\_\_\_\_

(2 digits)

RSH5. Are you the \_\_\_\_\_wife/live-in partner

- First  
 Second  
 Third  
 Forth  
 Other, specify

RSH5. Are you the \_\_\_\_\_wife/live-in partner, other specify

\_\_\_\_\_

RSH6. Are you living together with all co-wives/live-in partners in one house/boma?

- No  
 Yes

RSH7. Have you ever been married or lived together with a man?

- No  
 Yes  
 (No, skip to SAC1)

RSH8. Have you been married or lived with a man more than once?

- No  
 Yes

RSH9. How old were when you first started living with a man?

\_\_\_\_\_

(2 digits)

**Sexual activity and contraceptives**

SAC1. How old were you when you had sexual intercourse for the very first time?

\_\_\_\_\_  
(2 digits)

SAC2. When was the last time you had sexual intercourse?

- Day ago
- Weeks ago
- Months ago
- Years ago

SAC3. Sex with the last sexual partner, Was a condom used?

- No
- Yes

SAC4. Was a condom used every time you had sexual intercourse with the last person?

- No
- Yes

SAC5. What was your relationship to the person you had sex with last?

- Husband
- Partner
- Boyfriend
- Others, specify

SAC5. What was your relationship to the person you had sex with last? Other specify

\_\_\_\_\_

SAC6. How long ago did you first have sexual intercourse with this person? \_\_\_ days ago

\_\_\_\_\_

SAC6. How long ago did you first have sexual intercourse with this person? \_\_\_ weeks ago

\_\_\_\_\_

SAC6. How long ago did you first have sexual intercourse with this person? \_\_\_ Months ago

\_\_\_\_\_

SAC6. How long ago did you first have sexual intercourse with this person? \_\_\_ Years ago

\_\_\_\_\_

SAC7. How many times during the last \_\_\_ (refer to SAC6) did you have sexual contact with this person?

\_\_\_\_\_

SAC8. How old is this person?

\_\_\_\_\_

SAC9. Was this person circumcised?

- No
- Yes

SAC10. A part from this person, have you had sexual intercourse with any other person in the past 12 months?

- No
  - Yes
- (No, skip to SAC12)

SAC11. In total, with how many different people have you had sexual intercourse in the last 12 months

\_\_\_\_\_

SAC12. In the last 12 months, were you being paid by anyone in exchange for having sexual intercourse?

- No
- Yes

SAC13. In the last 12 months, did you pay anyone in exchange for having sexual intercourse?

- No
- Yes

SAC14. In total, with how many different people have you had sexual intercourse in your lifetime?

\_\_\_\_\_

SAC15. If SAC3 was YES, ask the following questions.

If NO skip to SAC21

You told me that a condom was used the last time you had sex. What is the brand name of the condom used at that time?

\_\_\_\_\_

SAC16. From where u obtain the condom the last time?

\_\_\_\_\_

SAC17. In the past 12 months have you given any gift or other goods in order to have sex or become sexually involved with someone?

- Yes  
 No

SAC18. The last time you had sex did you or your partner use any method other than a condom to avoid or prevent a pregnancy?

- No  
 Yes  
 (No, skip to SAC21)

SAC19. What method did you or your partner use?

- Female/male sterilization  
 IUD  
 Injectables  
 Implants  
 Pill  
 Male/female condom  
 Emergency  
 Standard days method  
 Lactational amenorrhea method  
 Rhythm method/withdrawal  
 Abstain  
 Other modern method  
 Other traditional method

Other modern Mention

\_\_\_\_\_

Other traditional mention

\_\_\_\_\_

SAC20. If answer for SAC 19 IS 11 or 12, ask to specify

\_\_\_\_\_

SAC21. Do you know of a place where you can obtain a method of family planning?

- No  
 Yes  
 (Yes, mention below)

SAC21. Do you know of a place where you can obtain a method of family planning? Yes mention

\_\_\_\_\_

---



---

## Fertility preferences

FP1. Are you pregnant now?

- No  
 Yes  
 (No, skip to FP7)

FP2. How many months pregnant are you now?

\_\_\_\_\_

FP3. When you got pregnant, did you want to get pregnant at that time?

- No  
 Yes  
 (yes, skip to FP9)

FP4. How much longer did you want to wait?

\_\_\_\_\_

FP5. After the child your (wife/partner) are expecting now, would you like have another child?

- No  
 Yes  
 (No, skip to FP9)



FP6. After the birth of the child you are expecting now, how long would you like to wait before the birth of another child?

\_\_\_\_\_

FP7. If MAR1 was NO, skip to FP9.  
Would you like to have another child?

- No  
 Yes  
 (No, skip to FP9)

FP8. How long would you like to wait from now before the birth of another child?

\_\_\_\_\_

(Years (if month are given, please calculate years by taking the number of months divided by 12))

FP9. If you could go back to the time you did not have any children and could choose exactly the number of children to have in your whole life, how many would that be?

\_\_\_\_\_

(skip to HIV1)

FP10. From now how much longer do you want to wait before you become pregnant?

\_\_\_\_\_

(Years (if month are given, please calculate years by taking the number of months divided by 12))

### HIV/AIDS General Knowledge and Awareness

HIV1. Now i would like to talk about something else. Have you ever heard of HIV or AIDS?

- No  
 Yes

HIV2. HIV is the virus that can lead to AIDS. Can a people reduce their chance of getting HIV by having just one uninfected sex partner who has no other sex partners?

- No  
 Yes  
 I don't know

HIV3. Can people reduce their chance of getting HIV by using a condom every time they have sex?

- No  
 Yes  
 I don't know

HIV4. Can HIV be transmitted from a mother to her baby? (circle/tick all that applies)

- During pregnancy  
 During delivery  
 By breastfeeding  
 I don't know

### Past Medical History on STI

PMHS1. During the last 12 months, have you had a disease which you got through sexual contact?

- No  
 Yes

PMHS2. Sometimes women experience an abnormal discharge from their vagina. During the last 12 months, have had an abnormal discharge from your vagina?

- No  
 Yes

PMHS3. Sometimes women have sore or ulcer near their vagina. During the last 12 months, have you had a sore or ulcer on or near your vagina?

- No  
 Yes

PMHS4. Ask this question if client has answered YES to any of the above questions. If NO skip to SRPW1

- No  
 Yes  
 (No, skip to SRPW1)

The last time you had (this problem) did you seek any kind of advice or treatment?

PMHS5. Where did you go?  
(probe for more all possible places) \_\_\_\_\_

---

---

**Sexual relationship with partner/wife**

SRPW1. If a husband knows his wife has a disease that he can get during sexual intercourse, is he justified in asking that they use condom when they have sex?  No  Yes

SRPW2. Is a husband justified in refusing to have sex with his wife when he knows she has sex with other men?  No  Yes

---

---

**Circumcision**

CIR1. Some women are circumcised, that is, the genitals have been cut. Are you circumcised?  NO  Yes  
(No, end interview)

CIR2. How old were you got circumcised? \_\_\_\_\_  
(Years (if month are given, please calculate years by taking the number of months divided by 12))

CIR3. Who did the circumcision? \_\_\_\_\_

CIR4. Where was it done? \_\_\_\_\_

CIR5. How do you feel about being circumcised? \_\_\_\_\_

Comments \_\_\_\_\_
